# Supplementary material for: High Gas Uptake and Selectivity in Hyper‐Crosslinked Porous Polymers Knitted by Various Nitrogen‐Containing Linkers
Source: PubMed Central journal article supplement — ChemistryOpen. 2017 Jun 20;6(4):554–61. doi: 10.1002/open.201700073 (PMC5542758; doi:10.1002/open.201700073), 2017-06-20
Supplement: OPEN-6-554-s001.pdf [file OPEN-6-554-s001.pdf]

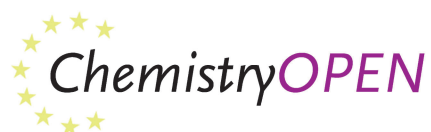

## Supporting Information

© 2017 The Authors. Published by Wiley-VCH Verlag GmbH & Co. KGaA, Weinheim

### **High Gas Uptake and Selectivity in Hyper-Crosslinked Porous Polymers Knitted by Various Nitrogen-Containing Linkers**

Ziyan Jia,<sup>[a, b]</sup> Jiannan Pan,<sup>[b]</sup> and Daqiang Yuan<sup>\*[a]</sup>

open\_201700073\_sm\_miscellaneous\_information.pdf

### Ideal adsorbed solution theory (IAST) selectivity studies:

In order to estimate the CO<sub>2</sub>/N<sub>2</sub> separation efficiency for the HCPs, a single-site Langmuir-Freundlich model was used to get selectivity parameters according to the ideal adsorbed solution theory (IAST) of Myers and Prausnitz.<sup>[1]</sup> The IAST calculations were carried out for binary mixture containing 15 % CO<sub>2</sub> (y<sub>1</sub>) and 85 % N<sub>2</sub> (y<sub>2</sub>), which is typical of flue gases. The pure component isotherms of CO<sub>2</sub> and N<sub>2</sub> measured at 273 K and 295 K were fitted with the single-site Langmuir-Freundlich model:

$$N = A \frac{bP^c}{1 + bP^c}$$

*N*: molar loading of species *i*, mmol/g

*A*: saturation capacity of species *i*, mmol/g

*P*: pressure, kPa

*b*: constant, kPa<sup>-1</sup>

*c*: constant

The adsorption selectivities, *S*<sub>ads</sub>, for binary mixtures of CO<sub>2</sub>/N<sub>2</sub>, defined

by  $S_{\text{ads}} = \frac{x_1/x_2}{y_1/y_2}$

*S*<sub>ads</sub>: adsorption selectivity

*x*<sub>*i*</sub>: the mole fractions of component *i* in the adsorbed phases

*y*<sub>*i*</sub>: the mole fractions of component *i* in the bulk phases

[1] Myers, A. L.; Prausnitz, J. M. AICHE J. 1965, 11, 121.

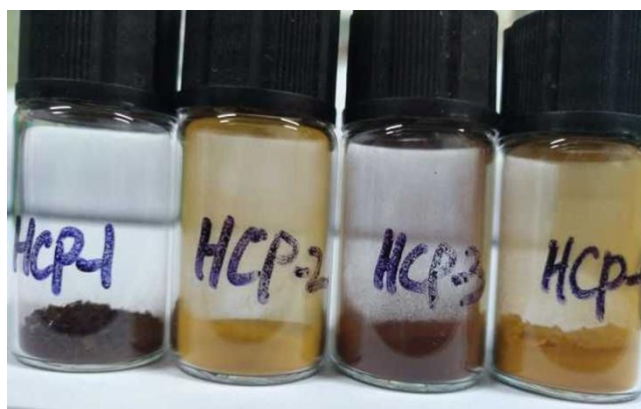

**Figure S1.** Color of the HCP-1-4 (from left to right).

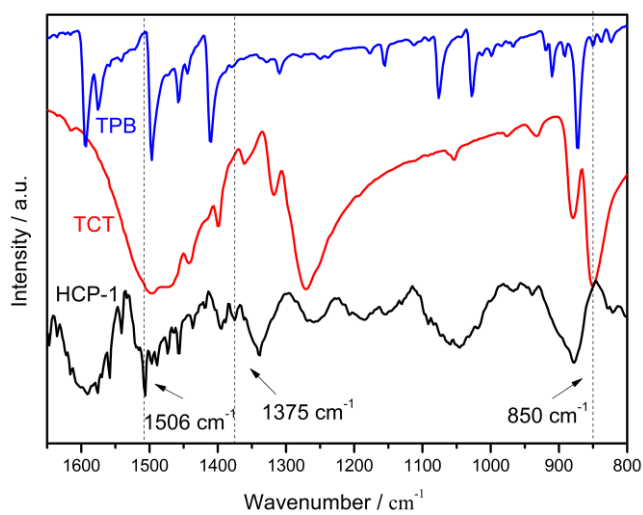

**Figure S2.** FT-IR spectra of HCP-1 and related starting materials.

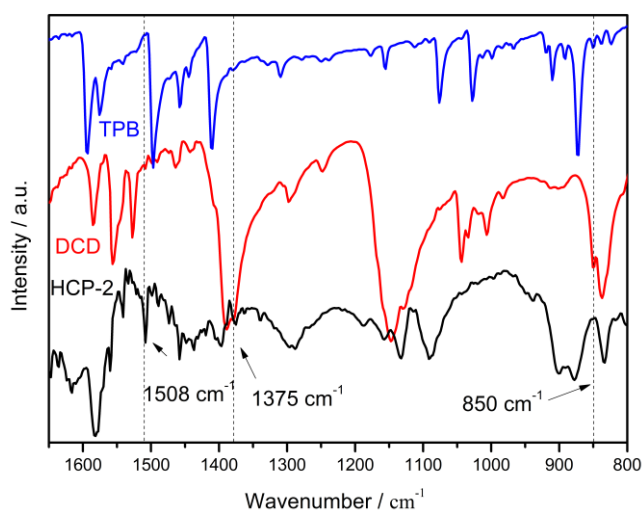

**Figure S3.** FT-IR spectra of HCP-2 and related starting materials.

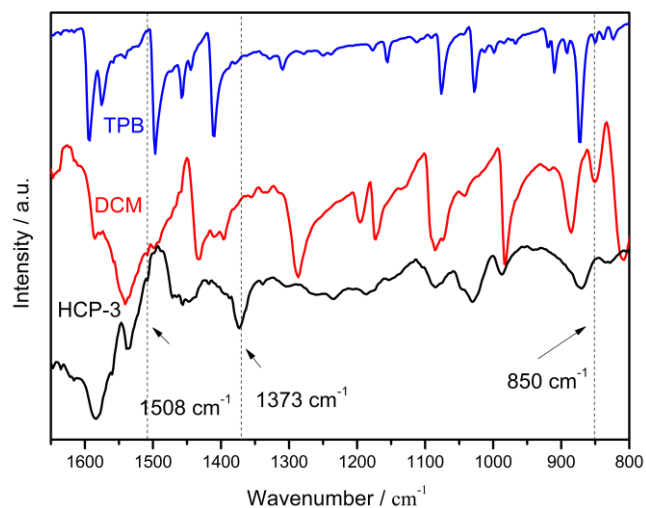

**Figure S4.** FT-IR spectra of HCP-3 and related starting materials.

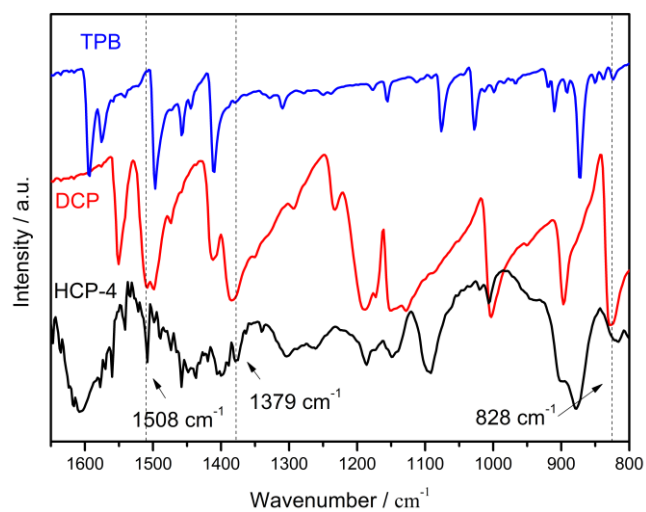

**Figure S5.** FT-IR spectra of HCP-4 and related starting materials.

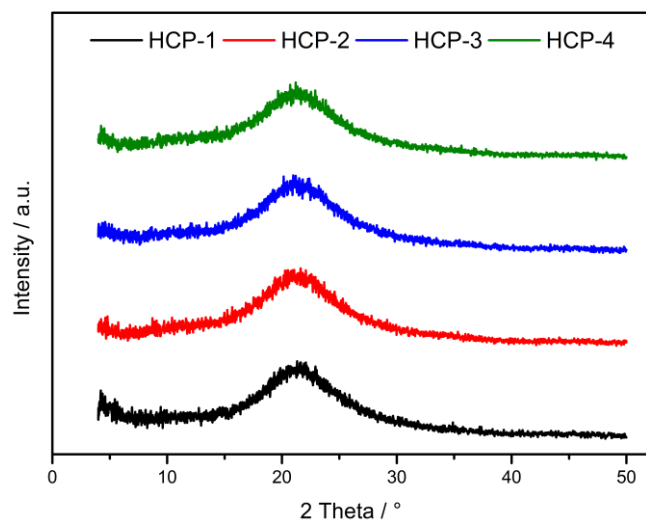

**Figure S6.** X-ray diffraction patterns of HCP-1-4.

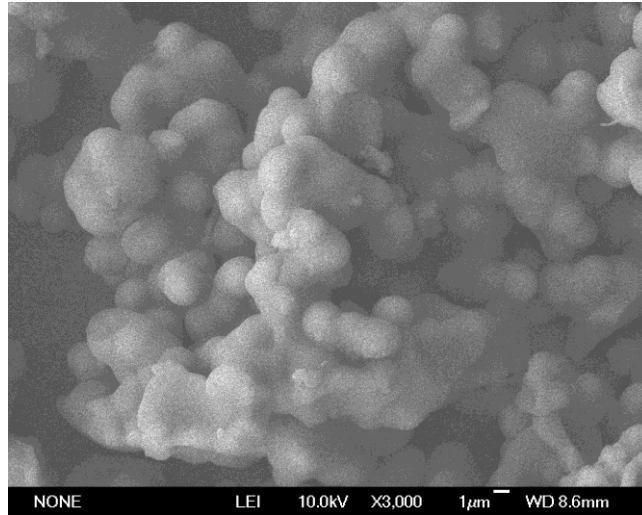

**Figure S7.** SEM image of HCP-1.

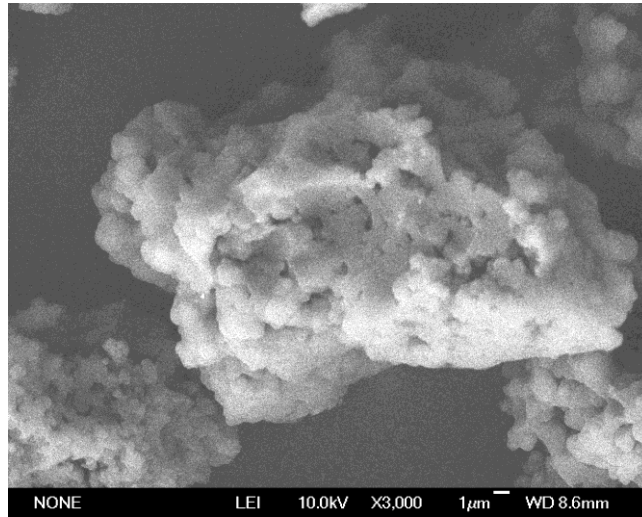

**Figure S8.** SEM image of HCP-2.

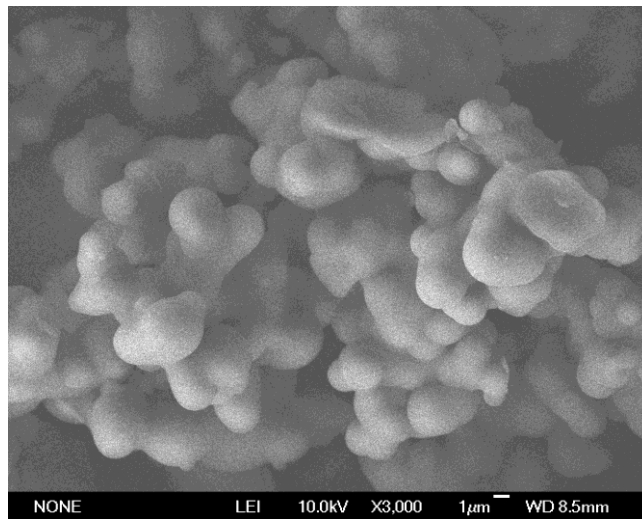

**Figure S9.** SEM image of HCP-3.

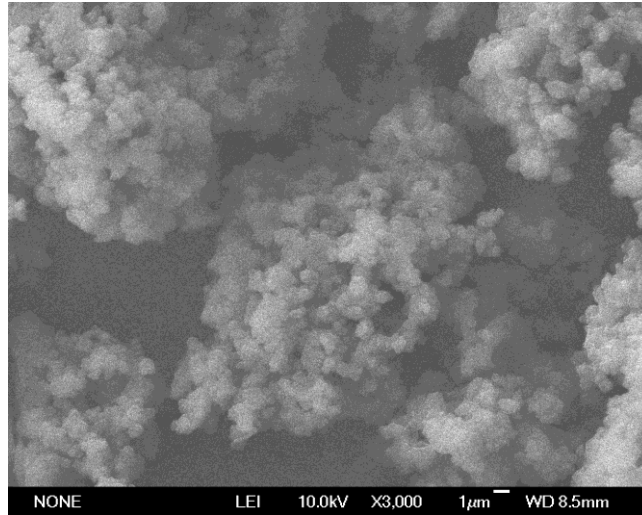

**Figure S10.** SEM image of HCP-4.

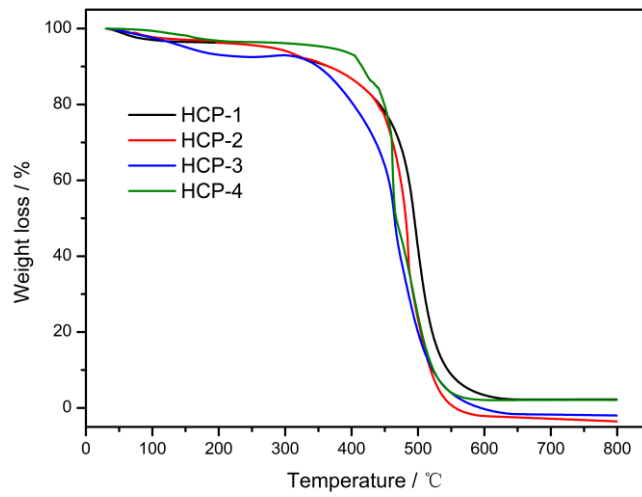

**Figure S11.** Thermogravimetric analysis of HCP-1-4 under air atmosphere.

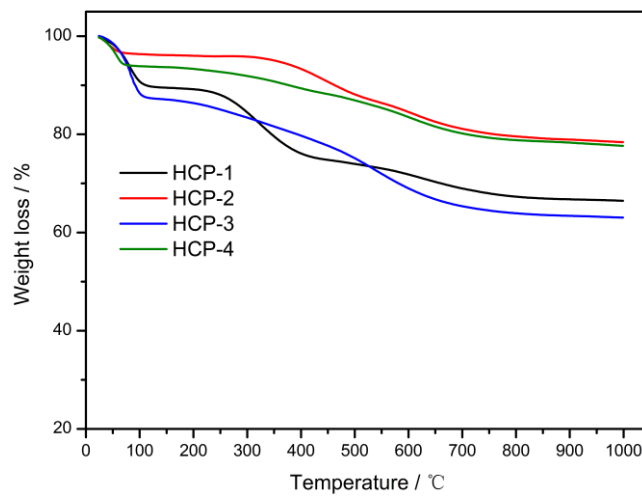

**Figure S12.** Thermogravimetric analysis of HCP-1-4 under nitrogen atmosphere.

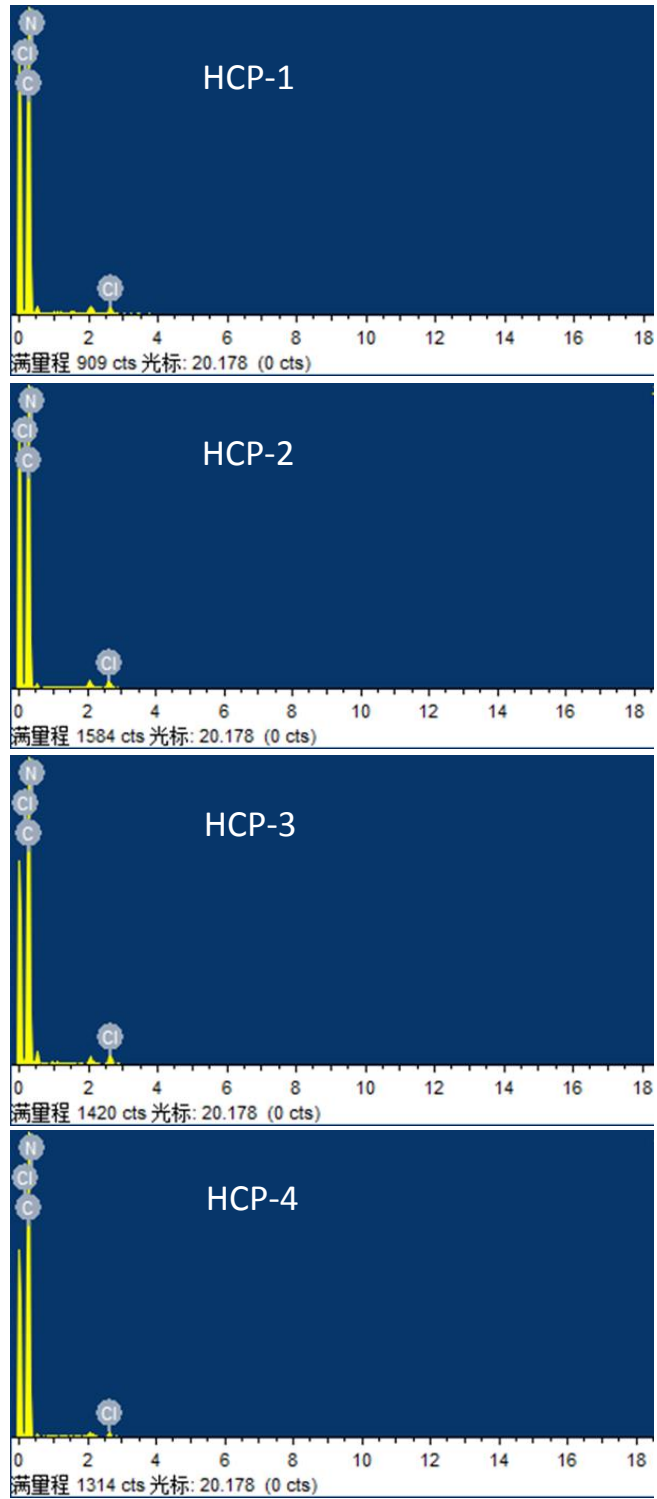

**Figure S13.** EDS analysis of HCP-1-4.

**Table S1** The weight percentages of different elements in HCPs.

| Polymers | C (%) | H (%) | N (%) | Cl (%) | Al (%) |
|----------|-------|-------|-------|--------|--------|
| HCP-1    | 70.45 | 5.70  | 5.95  | 1.05   | 0.29   |
| HCP-2    | 81.85 | 4.61  | 1.82  | 1.26   | 0.40   |
| HCP-3    | 71.46 | 5.72  | 4.52  | 1.92   | 0.34   |
| HCP-4    | 85.21 | 4.85  | 1.08  | 1.34   | 0.25   |
